# Supplementary material
Source: PubMed Central journal article supplement (PMC6407120)
Supplement: NIHMS995727-supplement-Supplemental_1.pdf [file NIHMS995727-supplement-Supplemental_1.pdf]

**Pre- and postnatal exposure of mice to concentrated urban PM<sub>2.5</sub> decreases the number of alveoli and leads to altered lung function at an early stage of life.**

Thais de Barros Mendes Lopes, Espen E. Groth, Mariana Veras, Tatiane K. Furuya, Natalia de Souza Xavier Costa, Gabriel Ribeiro Júnior, Fernanda Degobbi Lopes, Francine M. de Almeida, Wellington V. Cardoso, Paulo Hilario Nascimento Saldiva, Roger Chammas, Thais Mauad

[Supplementary Material](#)

*Pregnancy outcomes*

**Table S1.** Prenatal pregnancy outcomes of CAP-exposed and control dams and the respective *n* of fetuses used in analyses, if any.

| Time point   | Group   | Dam | Fetuses | Resorpt. | <i>n</i> stereology | <i>n</i> microarray analysis |
|--------------|---------|-----|---------|----------|---------------------|------------------------------|
| <b>E14.5</b> | Exposed | #1  | 13      | 0        | 2                   | 3                            |
|              |         | #2  | 7       | 3        | 2                   | 1                            |
|              |         | #3  | 2       | 5        | 2                   |                              |
|              | Control | #1  | 4       | 4        | 3                   | 2                            |
|              |         | #2  | 9       | 1        | 2                   | 2                            |
|              |         |     |         |          |                     |                              |
| <b>E18.5</b> | Exposed | #1  | 6       | 2        | 2                   | 1                            |
|              |         | #2  | 5       | 2        | 2                   | 1                            |
|              |         | #3  | 3       | 3        | 1                   | 1                            |
|              |         | #4  | 6       | 1        |                     | 1                            |
|              | Control | #1  | 3       | 3        | 1                   |                              |
|              |         | #2  | 6       |          |                     | 1                            |
|              |         | #3  | 4       | 2        | 2                   | 1                            |
|              |         | #4  | 2       |          | 1                   | 1                            |
|              |         | #5  | 1       | 2        |                     | 1                            |
|              |         |     |         |          |                     |                              |

Resorpt.: Resorptions.

**Table S2.** Litter size and sex distribution of offspring and *n* of offspring mice used in analyses (at P40) per dam.

| Group   | Dam | Litter size (m,f) | Dead-born | <i>n</i> lung function | <i>n</i> BAL | <i>n</i> stereology | <i>n</i> microarray analysis |
|---------|-----|-------------------|-----------|------------------------|--------------|---------------------|------------------------------|
| Exposed | #1  | 7 (4,3)           |           | 6                      | 3            | 3                   | 2                            |
|         | #2  | 2 (0,2)           | 1         | 2                      | 1            | 1                   | 1                            |
|         | #3  | 5 (4,1)           |           | 5                      | 5            | 1                   | 2                            |
| Control | #1  | 4 (0,4)           |           | 4                      | 4            | 2                   |                              |
|         | #2  | 3 (1,2)           |           | 2                      | 3            | 3                   | 2                            |
|         | #3  | 3 (1,2)           |           | 3                      | 2            |                     | 1                            |
|         | #4  | 6 (4,2)           |           | 4                      | 5            |                     | 2                            |
|         | #5  | 3 (2,1)           |           | 2                      | 3            |                     |                              |

m: males, f: females.

### Characterization of PM<sub>2.5</sub> composition

As previously described (Andrade et al., 2012; de Miranda et al., 2012; Mauad et al., 2008), we assessed the metal elemental composition and black carbon (BC) concentration of ambient air PM<sub>2.5</sub> during the months of animal exposure. In short, PM<sub>2.5</sub> was collected in suitable polycarbonate filter membranes. We used X-ray fluorescence spectrometry to measure the concentration of metal trace elements (Na, Al, Si, P, S, K, Ca, Ti, V, Fe, Ni, Cu, Zn, Pb) in a quantitative manner ( $n=17$ ). Furthermore, a smoke stain reflectometer was used to determine black carbon (BC) concentration ( $n=15$ ).

**Table S3.** Ambient air concentration as well as black carbon (BC) and metal trace element content of PM<sub>2.5</sub> sampled at our exposure site.

| Parameter            |                                     | Mean $\pm$ SD      | Min   | Max    |
|----------------------|-------------------------------------|--------------------|-------|--------|
| PM <sub>2.5</sub>    | ( $\mu\text{g}\cdot\text{m}^{-3}$ ) | 19.8 $\pm$ 11.4    | 7.2   | 52.9   |
| BC                   | ( $\mu\text{g}\cdot\text{m}^{-3}$ ) | 7.6 $\pm$ 6.5      | 1.2   | 27.0   |
| BC/PM <sub>2.5</sub> | (%)                                 | 38.2 $\pm$ 15.8    | 17.3  | 74.2   |
| Na                   | ( $\text{ng}\cdot\text{m}^{-3}$ )   | 200.9 $\pm$ 171.3  | 0.0   | 496.6  |
| Mg                   | ( $\text{ng}\cdot\text{m}^{-3}$ )   | 0.2 $\pm$ 0.8      | 0.0   | 3.1    |
| Al                   | ( $\text{ng}\cdot\text{m}^{-3}$ )   | 90.5 $\pm$ 83.6    | 0.0   | 301.9  |
| Si                   | ( $\text{ng}\cdot\text{m}^{-3}$ )   | 361.4 $\pm$ 206.5  | 121.2 | 887.4  |
| P                    | ( $\text{ng}\cdot\text{m}^{-3}$ )   | 33.5 $\pm$ 26.5    | 4.9   | 106.0  |
| S                    | ( $\text{ng}\cdot\text{m}^{-3}$ )   | 1441.0 $\pm$ 988.2 | 429.4 | 4465.8 |
| Cl                   | ( $\text{ng}\cdot\text{m}^{-3}$ )   | 25.0 $\pm$ 29.6    | 1.9   | 123.7  |
| K                    | ( $\text{ng}\cdot\text{m}^{-3}$ )   | 354.9 $\pm$ 357.0  | 41.6  | 1397.0 |
| Ca                   | ( $\text{ng}\cdot\text{m}^{-3}$ )   | 97.2 $\pm$ 52.2    | 11.0  | 198.3  |
| Ti                   | ( $\text{ng}\cdot\text{m}^{-3}$ )   | 9.3 $\pm$ 7.5      | 0.7   | 27.1   |
| V                    | ( $\text{ng}\cdot\text{m}^{-3}$ )   | 0.9 $\pm$ 1.2      | 0.0   | 4.6    |
| Cr                   | ( $\text{ng}\cdot\text{m}^{-3}$ )   | 0.3 $\pm$ 0.7      | 0.0   | 2.6    |
| Mn                   | ( $\text{ng}\cdot\text{m}^{-3}$ )   | 4.9 $\pm$ 3.0      | 0.3   | 11.0   |
| Fe                   | ( $\text{ng}\cdot\text{m}^{-3}$ )   | 182.9 $\pm$ 117.5  | 23.6  | 426.8  |
| Ni                   | ( $\text{ng}\cdot\text{m}^{-3}$ )   | 0.7 $\pm$ 0.6      | 0.0   | 1.9    |
| Cu                   | ( $\text{ng}\cdot\text{m}^{-3}$ )   | 6.6 $\pm$ 7.4      | 0.0   | 28.5   |
| Zn                   | ( $\text{ng}\cdot\text{m}^{-3}$ )   | 66.6 $\pm$ 44.7    | 10.5  | 169.8  |
| Se                   | ( $\text{ng}\cdot\text{m}^{-3}$ )   | 2.5 $\pm$ 3.0      | 0.0   | 11.4   |
| Br                   | ( $\text{ng}\cdot\text{m}^{-3}$ )   | 6.8 $\pm$ 10.0     | 0.0   | 40.8   |
| Pb                   | ( $\text{ng}\cdot\text{m}^{-3}$ )   | 7.8 $\pm$ 6.1      | 0.3   | 19.3   |

*Lung function in male and female animals*

**Table S4.** Lung function (flexiVent) of exposed and control mice at P40 (males).

| Parameter                                                | Mean $\pm$ SD    |                  | <i>p</i> |
|----------------------------------------------------------|------------------|------------------|----------|
|                                                          | Exposed          | Control          |          |
| Weight (g)                                               | 20.1 $\pm$ 1.6   | 23.1 $\pm$ 1.5   | 0.006**  |
| R (cm H <sub>2</sub> O·s·mL <sup>-1</sup> )              | 0.81 $\pm$ 0.17  | 0.72 $\pm$ 0.15  | 0.35     |
| E (cm H <sub>2</sub> O·mL <sup>-1</sup> )                | 32.37 $\pm$ 6.22 | 26.83 $\pm$ 3.47 | 0.10     |
| R <sub>n</sub> (cm H <sub>2</sub> O·s·mL <sup>-1</sup> ) | 0.33 $\pm$ 0.13  | 0.25 $\pm$ 0.08  | 0.25     |
| G (cm H <sub>2</sub> O·mL <sup>-1</sup> )                | 5.51 $\pm$ 2.23  | 5.44 $\pm$ 1.18  | 0.95     |
| H (cm H <sub>2</sub> O·mL <sup>-1</sup> )                | 30.43 $\pm$ 5.61 | 22.73 $\pm$ 2.88 | 0.02*    |

*n*=8 in exposed, *n*=5 in control group. R: dynamic resistance, E: dynamic elastance, R<sub>n</sub>: Newtonian resistance, G: tissue damping, H: tissue elastance.

**Table S5.** Lung function (flexiVent) of exposed and control mice at P40 (females).

| Parameter                                                | Mean $\pm$ SD     |                  | <i>p</i> |
|----------------------------------------------------------|-------------------|------------------|----------|
|                                                          | Exposed           | Control          |          |
| Weight (g)                                               | 19.8 $\pm$ 1.6    | 19.5 $\pm$ 2.0   | 0.83     |
| R (cm H <sub>2</sub> O·s·mL <sup>-1</sup> )              | 0.85 $\pm$ 0.11   | 0.77 $\pm$ 0.13  | 0.31     |
| E (cm H <sub>2</sub> O·mL <sup>-1</sup> )                | 37.4 $\pm$ 9.70   | 31.10 $\pm$ 3.85 | 0.09     |
| R <sub>n</sub> (cm H <sub>2</sub> O·s·mL <sup>-1</sup> ) | 0.26 $\pm$ 0.03   | 0.30 $\pm$ 0.09  | 0.37     |
| G (cm H <sub>2</sub> O·mL <sup>-1</sup> )                | 6.72 $\pm$ 1.04   | 6.22 $\pm$ 0.96  | 0.37     |
| H (cm H <sub>2</sub> O·mL <sup>-1</sup> )                | 35.64 $\pm$ 11.00 | 29.25 $\pm$ 4.75 | 0.13     |

*n*=5 in exposed, *n*=10 in control group. R: dynamic resistance, E: dynamic elastance, R<sub>n</sub>: Newtonian resistance, G: tissue damping, H: tissue elastance.

*Bronchoalveolar lavage*

**Table S6.** Differential cell counts in BAL fluid of exposed and control animals at P40.

| Cell type        | Mean $\pm$ SD   |                 | <i>p</i> |
|------------------|-----------------|-----------------|----------|
|                  | Exposed         | Control         |          |
| Neutrophils      | 0.00            | 0.08 $\pm$ 0.13 | 0.07     |
| Lymphocytes      | 0.06 $\pm$ 0.07 | 0.07 $\pm$ 0.07 | 0.65     |
| Eosinophils      | 0.00            | 0.00            |          |
| Macrophages      | 4.63 $\pm$ 2.10 | 3.70 $\pm$ 1.91 | 0.26     |
| Total            | 4.69 $\pm$ 2.12 | 3.85 $\pm$ 1.94 | 0.32     |
| Neutrophils (%)  | 0.0             | 1.9 $\pm$ 3.3   | 0.09     |
| Lymphocytes (%)  | 1.2 $\pm$ 1.7   | 1.9 $\pm$ 1.9   | 0.37     |
| Eosinophils (%)  | 0.0             | 0.0             |          |
| Macrophages (%)  | 98.8 $\pm$ 1.7  | 96.1 $\pm$ 4.2  | 0.09     |
| Epithelial cells | 0.33 $\pm$ 0.24 | 0.54 $\pm$ 0.51 | 0.25     |

Values in  $10^4$  cells·mL<sup>-1</sup> if not mentioned differently.

*Stereology*

**Table S7.** Stereological measures of lungs of prenatally exposed and control fetuses at E14.5 (pseudoglandular stage).

| Parameter                          |                                     | Mean $\pm$ SD     |                   | <i>p</i> |
|------------------------------------|-------------------------------------|-------------------|-------------------|----------|
|                                    |                                     | Exposed           | Control           |          |
| Fetus weight                       | (g)                                 | 0.146 $\pm$ 0.060 | 0.114 $\pm$ 0.057 | 0.40     |
| Lung volume                        | (mm <sup>3</sup> )                  | 0.90 $\pm$ 0.43   | 0.62 $\pm$ 0.45   | 0.32     |
| Volume/weight ratio                | (mm <sup>3</sup> ·g <sup>-1</sup> ) | 6.36 $\pm$ 2.32   | 4.99 $\pm$ 2.56   | 0.37     |
| V <sub>f</sub> of mesenchyme       | (%)                                 | 49.2 $\pm$ 6.5    | 55.4 $\pm$ 6.1    | 0.14     |
| V <sub>f</sub> of epithelial tubes | (%)                                 | 36.0 $\pm$ 6.1    | 30.2 $\pm$ 6.9    | 0.17     |
| V <sub>f</sub> of vessels          | (%)                                 | 14.8 $\pm$ 1.3    | 14.4 $\pm$ 2.4    | 0.73     |
| V <sub>t</sub> of mesenchyme       | (mm <sup>3</sup> )                  | 0.43 $\pm$ 0.16   | 0.33 $\pm$ 0.22   | 0.40     |
| V <sub>t</sub> of epithelial tubes | (mm <sup>3</sup> )                  | 0.34 $\pm$ 0.21   | 0.21 $\pm$ 0.18   | 0.29     |
| V <sub>t</sub> of vessels          | (mm <sup>3</sup> )                  | 0.13 $\pm$ 0.07   | 0.08 $\pm$ 0.06   | 0.25     |

V<sub>f</sub>: volume fraction, V<sub>t</sub>: total volume.

**Table S8.** Stereological measures of lungs of prenatally exposed and control fetuses at E18.5 (saccular stage).

| Parameter                    |                                     | Mean $\pm$ SD       |                     | <i>p</i> |
|------------------------------|-------------------------------------|---------------------|---------------------|----------|
|                              |                                     | Exposed             | Control             |          |
| Lung weight                  | (g)                                 | 0.022 $\pm$ 0.004   | 0.027 $\pm$ 0.005   | 0.19     |
| Lung volume                  | (mm <sup>3</sup> )                  | 15.37 $\pm$ 6.91    | 23.00 $\pm$ 12.22   | 0.27     |
| Volume/weight ratio          | (mm <sup>3</sup> ·g <sup>-1</sup> ) | 685.99 $\pm$ 312.35 | 832.96 $\pm$ 387.59 | 0.55     |
| V <sub>f</sub> of mesenchyme | (%)                                 | 64.0 $\pm$ 5.9      | 63.4 $\pm$ 4.6      | 0.86     |
| V <sub>f</sub> of airways    | (%)                                 | 8.1 $\pm$ 3.8       | 9.3 $\pm$ 1.0       | 0.56     |
| V <sub>f</sub> of vessels    | (%)                                 | 5.3 $\pm$ 3.5       | 4.6 $\pm$ 2.4       | 0.73     |
| V <sub>f</sub> of saccules   | (%)                                 | 22.6 $\pm$ 3.3      | 22.8 $\pm$ 5.4      | 0.95     |
| V <sub>t</sub> of mesenchyme | (mm <sup>3</sup> )                  | 10.05 $\pm$ 4.94    | 14.41 $\pm$ 7.64    | 0.33     |
| V <sub>t</sub> of airways    | (mm <sup>3</sup> )                  | 1.22 $\pm$ 0.78     | 2.05 $\pm$ 0.94     | 0.19     |
| V <sub>t</sub> of vessels    | (mm <sup>3</sup> )                  | 0.66 $\pm$ 0.23     | 0.900 $\pm$ 0.53    | 0.38     |
| V <sub>t</sub> of saccules   | (mm <sup>3</sup> )                  | 3.44 $\pm$ 1.63     | 5.65 $\pm$ 3.49     | 0.25     |
| S <sub>D</sub> of saccules   | (mm <sup>-1</sup> )                 | 1.28 $\pm$ 0.27     | 1.05 $\pm$ 0.05     | 0.15     |
| S <sub>A</sub> of saccules   | (mm <sup>2</sup> )                  | 20.28 $\pm$ 10.589  | 23.93 $\pm$ 12.60   | 0.65     |

V<sub>f</sub>: volume fraction, V<sub>t</sub>: total volume, S<sub>D</sub>: surface density, S<sub>A</sub>: surface area.

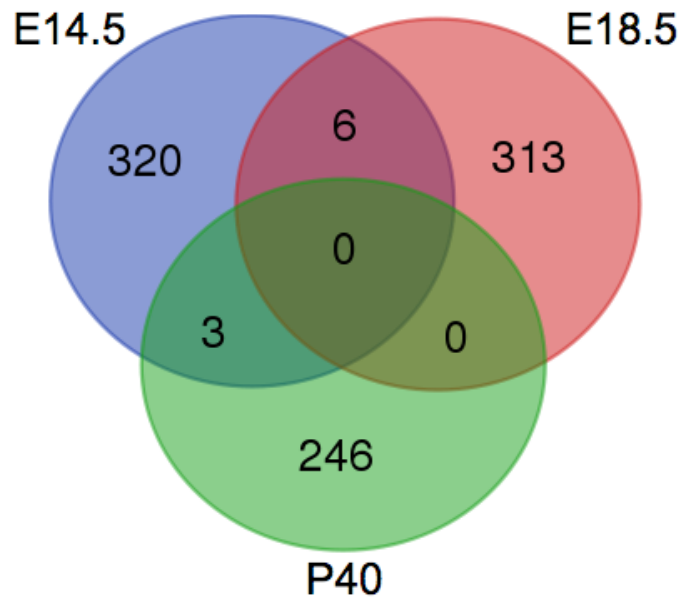

**Figure S1.** Venn diagram of DEGs at E14.5, E18.5 and P40.

**Table S9.** DEGs  $E14.5 \cap E18.5$ .

| Gene Symbol  | Gene Description                                                   | E14.5       |          | E18.5       |          |
|--------------|--------------------------------------------------------------------|-------------|----------|-------------|----------|
|              |                                                                    | $\log_2$ FC | <i>p</i> | $\log_2$ FC | <i>p</i> |
| C87198       | expressed sequence C87198                                          | 0.74        | 0.0009   | -0.62       | 0.0098   |
| Ccr2         | chemokine (C-C motif) receptor 2                                   | 0.78        | 0.0016   | -0.47       | 0.0055   |
| G3bp2        | GTPase activating protein (SH3 domain) binding protein 2           | -0.08       | 0.0038   | 0.26        | 0.0076   |
| Cyrr1        | cysteine and tyrosine-rich protein 1                               | 0.54        | 0.0013   | -0.48       | 0.0092   |
| Trpc1        | transient receptor potential cation channel, subfamily C, member 1 | 0.34        | 0.00005  | -0.39       | 0.0068   |
| LOC105243101 | keratin-associated protein 5-4-like                                | -0.34       | 0.0098   | 0.68        | 0.0100   |

**Table S10.** DEGs  $E14.5 \cap P40$ .

| Gene Symbol | Gene Description                               | E14.5       |          | P40         |          |
|-------------|------------------------------------------------|-------------|----------|-------------|----------|
|             |                                                | $\log_2$ FC | <i>p</i> | $\log_2$ FC | <i>p</i> |
| Rxfp2       | relaxin/insulin-like family peptide receptor 2 | -0.86       | 0.0041   | -0.32       | 0.0029   |
| Fopnl       | Fgfr1op N-terminal like                        | 0.15        | 0.0012   | -0.25       | 0.0097   |
| Olf1371     | olfactory receptor 1371                        | 0.25        | 0.0019   | 0.23        | 0.00005  |

## References

Andrade, M.D., de Miranda, R.M., Fornaro, A., Kerr, A., Oyama, B., de Andre, P.A., Saldiva, P., 2012. Vehicle emissions and PM(2.5) mass concentrations in six Brazilian cities. *Air Qual Atmos Health* 5, 79-88. <http://dx.doi.org/10.1007/s11869-010-0104-5>

de Miranda, R.M., de Fatima Andrade, M., Fornaro, A., Astolfo, R., de Andre, P.A., Saldiva, P., 2012. Urban air pollution: a representative survey of PM(2.5) mass concentrations in six Brazilian cities. *Air Qual Atmos Health* 5, 63-77. <http://dx.doi.org/10.1007/s11869-010-0124-1>

Mauad, T., Rivero, D.H., de Oliveira, R.C., Lichtenfels, A.J., Guimaraes, E.T., de Andre, P.A., Kasahara, D.I., Bueno, H.M., Saldiva, P.H., 2008. Chronic exposure to ambient levels of urban particles affects mouse lung development. *Am J Respir Crit Care Med* 178, 721-728. <http://dx.doi.org/10.1164/rccm.200803-436OC>
